# Supplementary material
Source: publisher site journal article supplement (https://www.dovepress.com/get_supplementary_file.php?f=361796.docx)
Supplement: Supplementary file 1 [file get_supplementary_file.php]

**Supplementary material**

**Table:** Assessment ofthe effect of intimate partner violence on birth preparedness and complication readiness among women in public health facilities, southwest Ethiopia, 2021: comparative cross-sectional study

| **part I**: **Socio-demographic characteristics of women** | | | | | | | | | | | | |
| --- | --- | --- | --- | --- | --- | --- | --- | --- | --- | --- | --- | --- |
| **S/no** | | **Questions** | | **Answers/choices** | | | | **Skip** | | | | |
| 101 | | Current age of woman? | | ___________ year | | | |  | | | | |
| 102 | | Husband’s /Partner’s age? | | ___________year | | | |  | | | | |
| 103 | | What is your religion? | | 1. Orthodox 2. Muslim 3. Protestant 4. Catholic 5. Others (Specify)________ | | | |  | | | | |
| 104 | | Residence? | | 1. Rural 2. Urban | | | |  | | | | |
| 105 | | Current Marital status? | | 1. Single 2. Married 3. Divorced 4. Widowed 5. Separated | | | | If Q no 105 answer is not 2 skipping until Q no 109 | | | | |
| 106 | | If you are married, age at marriage? | | ____________ Year | | | |  | | | | |
| 107 | | Who choose your current/most recent husband? | | 1. Both 2. My self 3. My family 4. Partner choose 5. Partner’s family 6. Other (specify)__________ | | | |  | | | | |
| 108 | | What type of marriage ceremony did you have to formalize the union? | | 1. None 2. Civil marriage 3. Religious marriage 4. Customary marriage 5. Others (specify)________ | | | |  | | | | |
| 109 | | Did your marriage involve dowry/bride price payment? | | 1. Yes 2. No 3. I don’t know | | | |  | | | | |
| 110 | | What is your educational status? | | 1. No formal education 2. Primary education (Grade1_8) 3. Secondary education(9-12) 4. More than secondary(above grade 12) | | | |  | | | | |
| 111 | | What is your partner’s educational status? | | 1. No formal education 2. Primary education(Grade1_8) 3. Secondary education(9-12) 4. More than secondary(above Grade 12) | | | |  | | | | |
| 112 | | What is your occupation? | | 1. House wife 2. Farmer 3. Student 4. Private employee 5. Government employee 6. Merchant 7. Others (specify)________ | | | |  | | | | |
| 113 | | What is your partner’s occupation? | | 1. Farmer 2. Student 3. Private employee 4. Government employee 5. Merchant 6. Others (specify)__________ | | | |  | | | | |
| 114 | | Ethnicity | | 1. Benchi 2. Kafficho 3. Shakacho 4. Others (specify)__________ | | | |  | | | | |
| 115 | | How much is your family average monthly income? | | ____________in ETB | | | |  | | | | |
| 116 | | How long would it take to reach this health facility? | | ____________in minutes | | | |  | | | | |
| 117 | | With whom you are currently living? | | 1. My partner 2. My parents 3. Any of my relatives 4. My partner’s family 5. Others (specify)_______ | | | | If not 1 skip to Q119 | | | | |
| 118 | | If your answer in Q no 117 is 1 who is the decision maker in all affairs of the household? | | 1. Husband 2. Wife 3. Equally | | | |  | | | | |
| 119 | | Have you diagnosed mental illness by health care provider currently or in the past life? | | 1. Yes 2. No | | | |  | | | | |
| **Part II ፡ husband /partner’s behavior during recent pregnancy question** | | | | | | | | | | | | |
| 201 | | Did your husband/partner drink alcoholic beverages during recent pregnancy like Areke, Tella, and Tej? | | 1. Yes 2. No 3. I don’t know | | | | | If 2/3 skip to Q 203 | | | |
| 202 | | How frequently did your husband/partner drink alcoholic beverages like Areke, Tella, and  Tej? | | 1. Daily 2. 1-2 times/week 3. 1-3 times/month 4. Less than 1 times in a month 5. Others (specify)________ | | | | |  | | | |
| 203 | | Did your husband/partner chew Kchat/Qat during recent pregnancy? | | 1. Yes 2. No 3. I don’t know | | | | | If 2/3 skip to Q 205 | | | |
| 204 | | How frequently did your husband/ partner chew Kchat/Qat? | | 1. Daily 2. 1-2 times/week 3. 1-3 times/month 4. Less than 1 times in a month 5. Others (specify)_______ | | | | |  | | | |
| 205 | | Did your husband/partner smoke cigarette during recent pregnancy? | | 1. Yes 2. No 3. I don’t know | | | | | If 2/3 skip to Q 301 | | | |
| 206 | | How frequently did your husband/partner smoke cigarette? | | 1. Daily 2. 1-2 times /week 3. 1-3 times/month 4. Less than one 1 times in month 5. Others (specify)________ | | | | |  | | | |
| **Part III :socio-cultural and family experience of violence** | | | | | | | | | | | | |
| 301 | | When you were a child, was your mother hit by your father (her husband)? | | 1. Yes 2. No 3. Not remember | | | | |  | | | |
| 302 | | As far as you know, did your father ever beat your mother? | | 1. Yes 2. No 3. Not remember | | | | |  | | | |
| 303 | | Did you experience any violence during child hood? | | 1. Yes 2. No 3. Not remember | | | | |  | | | |
| 304 | | According to your opinion, what are good reasons for a husband to beat his wife?  (More than one answer is possible) | | 1. Fails to complete house work 2. Argues with him 3. Goes out without telling him 4. Refuses sex with him 5. He suspects /founds her to be un faithful 6. Others (specify)_________ | | | | |  | | | |
| **Part IV: Obstetrics/reproductive related questions** | | | | | | | | | | | | |
| 401 | | Age at first pregnancy? | | _____________Year. | | | | |  | | | |
| 402 | | How many pregnancies did you have (number of total pregnancies)? (Gravidity?) | | ___________ | | | | |  | | | |
| 403 | | How many children’s did you give birth? (Parity?) | | ______________ | | | | |  | | | |
| 404 | | Family size(including children, parents and any family member who live together) | |  | | | | |  | | | |
| 405 | | Did you desire recent pregnancy? | | 1. Yes 2. No | | | | |  | | | |
| 406 | | Did your husband want/ desire recent pregnancy? | | 1. Yes 2. No 3. I don’t know | | | | |  | | | |
| 407 | | Did you have ANC follow up? | | 1. Yes  2. No | | | | |  | | | |
| 408 | | How many ANC visit did you have? | |  | | | | |  | | | |
| 409 | | Did you had faced any obstetric complication in the previous pregnancy | | 1. Yes  2. No | | | | |  | | | |
| 410 | | What was that pregnancy related complication in the previous pregnancy | | 1. Abortion  2. Stillbirth/IUFD  3. preterm birth  4. Others specify.. | | | | |  | | | |
| 411 | | Are you advised to prepare for birth and its complication during your ANC follow up time? | | 1. Yes 2. no | | | | |  | | | |
| 412 | | Where you gave your last birth? | | 1. Home 2. Health institution | | | | |  | | | |
| **Part V**፡ **about psychological(emotional ),physical and sexual violence:** | | | | | | | | | | | | |
| **Psychological(emotional) violence** | | | | | | | | | | | | |
| 501 | | Did your partner/ husband perform violence during recent pregnant? | | | | 1. Yes 2. No | | | | |  | |
|  | |  | | | | Had this happened during the recent pregnancy  **Yes**  **No** | | | | |  | |
| 502 | | Insulted/made feel bad about your self | | | | 1 2 | | | | |  | |
| 503 | | Belittled or humiliated in front of other people | | | | 1 2 | | | | |  | |
| 504 | | Scared or intimidated on purpose | | | | 1 2 | | | | |  | |
| 505 | | Threatened when asking friends/family | | | | 1 2 | | | | |  | |
| **Physical violence** | | | | | | | | | | | | |
| 506 | | Slapped you or thrown something at you that could hurt you? | | | | 1 2 | | | | |  | |
| 507 | | Pushed you or shoved or pulled your hair? | | | | 1 2 | | | | |  | |
| 508 | | Hit you with his fist or with something else that could hurt you? | | | | 1 2 | | | | |  | |
| 509 | | During pregnancy, hit your abdomen with a fist/with something else? | | | | 1 2 | | | | |  | |
| 510 | | Choked or burnt you on purpose? | | | | 1 2 | | | | |  | |
| 511 | | Threatened to use or actually used a gun, knife, or any other weapon against you? | | | | 1 2 | | | | |  | |
| **Sexual violence** | | | | | | | | | | | | |
| Has your partner ever…… | | | | | | | | | | | | |
| 512 | | Physically forced you to have sexual intercourse | | | | 1 2 | | | | |  | |
| 513 | | Having unwanted sexual intercourse because of fear from the partner | | | | 1 2 | | | | |  | |
| 514 | | Forced you to do something sexual that is degrading or humiliating | | | | 1 2 | | | | |  | |
| **Part VI: knowledge of birth preparedness and complication readiness** | | | | | | | | | | | | | | |
| 601 | Have you ever heard the term “birth preparedness and complication readiness”? | | | | 1. Yes  2. No | | | | | | |  | | |
| 602 | Where did you get this information? | | | | 1.Health care provider  2.Family members  3. Mass media  4.Others specify------ | | | | | | |  | | |
|  | | | | | when the women mention items choose “YES” | | | | | | |  | | |
|  |  | | | | Yes | | | | No | | |  | | |
| 603 | Identify appropriate health facility | | | | 1 | | | | 2 | | |  | | |
| 604 | Choose a skilled provider | | | | 1 | | | | 2 | | |  | | |
| 605 | Make a plan for transportation means | | | | 1 | | | | 2 | | |  | | |
| 606 | Make a plan for communication means | | | | 1 | | | | 2 | | |  | | |
| 607 | Save money to be used during emergency | | | | 1 | | | | 2 | | |  | | |
| 608 | Prepare essential items for clean and safe delivery | | | | 1 | | | | 2 | | |  | | |
| 609 | Identify support people to help | | | | 1 | | | | 2 | | |  | | |
| 610 | Be able to identify the sign of an obstetric emergency | | | | 1 | | | | 2 | | |  | | |
| 612 | Know the importance of seeking care without delay when Complication occur | | | | 1 | | | | 2 | | |  | | |
| 613 | Have a plan to be able to respond immediately in the event of an emergency to avoid delays | | | | 1 | | | | 2 | | |  | | |
| 614 | Know the location of the nearest health facility where emergency service is provided | | | | 1 | | | | 2 | | |  | | |
| 615 | Arranging blood donors in case of an emergency | | | | 1 | | | | 2 | | |  | | |
| **Part VII: practice of birth preparedness and complication readiness** | | | | | | | | | | | | | | |
|  | | |  | | | | Yes | | | No | | | |  |
| 701 | | | Did you plan to give birth at in health facility? | | | | 1 | | | 2 | | | |  |
| 702 | | | Did you identify a mode of transport? | | | | 1 | | | 2 | | | |  |
| 703 | | | Did you save money to be used during emergency? | | | |  | | |  | | | |  |
| 704 | | | Did you identify a blood donor? | | | |  | | |  | | | |  |
| 705 | | | Did you identify support people to help you | | | |  | | |  | | | |  |
| 706 | | | Did you choose a skilled provider | | | |  | | |  | | | |  |
| 707 | | | Did you make a plan for communication means | | | |  | | |  | | | |  |
| 708 | | | Did you prepare essential items for clean and safe delivery | | | |  | | |  | | | |  |
| 709 | | | Be able to identify the sign of an obstetric emergency | | | |  | | |  | | | |  |
| 710 | | | Know importance of seek care without delay when Complication occur | | | |  | | |  | | | |  |
| 711 | | | Have you plan to be able to respond immediately in the event of an emergency to avoid delays | | | |  | | |  | | | |  |
| 712 | | | Know the location of the nearest health facility where emergency service is provided. | | | |  | | |  | | | |  |

| **Part VIII: Knowledge of danger signs** | | | | |
| --- | --- | --- | --- | --- |
| 801 | Have you ever heard the term “obstetric danger sign of pregnancy, labor and post natal period”? | 1. Yes 2. No | |  |
|  | **what are danger signs that occur during pregnancy** | when the women mention items choose “YES” | |  |
|  |  | Yes | No |  |
| 802 | Vaginal bleeding | 1 | 2 |  |
| 803 | Swollen hands and face | 1 | 2 |  |
| 804 | Blurred vision | 1 | 2 |  |
| 805 | High fever | 1 | 2 |  |
| 806 | Severe lower abdominal pain | 1 | 2 |  |
| 807 | Fits or loss of consciousness | 1 | 2 |  |
|  | **what are danger signs that occur during labor and delivery** |  |  |  |
| 808 | Severe vaginal bleeding | 1 | 2 |  |
| 809 | Prolonged labor >12h | 1 | 2 |  |
| 810 | Hand, feet, cord or face appears first | 1 | 2 |  |
| 811 | Retained placenta | 1 | 2 |  |
| 812 | Fits or loss of consciousness | 1 | 2 |  |
| 813 | Severe headache | 1 | 2 |  |
|  | **what are danger signs that occur during postpartum period** |  |  |  |
| 814 | Vaginal bleeding | 1 | 2 |  |
| 815 | Offensive Vaginal discharge | 1 | 2 |  |
| 816 | Severe Headache | 1 | 2 |  |
| 817 | Blurred vision | 1 | 2 |  |
| 818 | Fever | 1 | 2 |  |
| 819 | Fits or loss of consciousness | 1 | 2 |  |

THE END

Thank you !!!
